# Supplementary material for: Targeted biallelic integration of an inducible Caspase 9 suicide gene in iPSCs for safer therapies
Source: PubMed Central journal article supplement — Mol Ther Methods Clin Dev. 2022 May 31;26:84–94. doi: 10.1016/j.omtm.2022.05.011 (PMC9234009; doi:10.1016/j.omtm.2022.05.011), 2022-05-31
Supplement: mmc1.pdf [file mmc1.pdf]

**Supplemental information**

**Targeted biallelic integration of an inducible**

**Caspase 9 suicide gene**

**in iPSCs for safer therapies**

**Stephanie Wunderlich, Alexandra Haase, Sylvia Merkert, Kirsten Jahn, Maximilian Deest, Helge Frieling, Silke Glage, Wilhelm Korte, Andreas Martens, Andreas Kirschning, Andre Zeug, Evgeni Ponimaskin, Gudrun Göhring, Mania Ackermann, Nico Lachmann, Thomas Moritz, Robert Zweigerdt, and Ulrich Martin**

## Supplement

### Supplementary Tables

**Table S1: Primers and expected sizes of PCR products.** Please see figure S1 for schematic illustration of the primer positions. Abbreviations: IT, Integrated transgene; RAS, Reverse antisense; WT, Wild type.

|                           | <b>Forward primer</b>                                                | <b>RAS primer</b>              | <b>Product size</b> |
|---------------------------|----------------------------------------------------------------------|--------------------------------|---------------------|
| 5'junction                | Forward CCA GCT CCC ATA GCT CAG TCT G                                | RAS ATG GGG AGA GTG AAG CAG AA | 1535bp              |
| 3'junction                | Forward CCC CTG CTG TCC ATT CCT TA                                   | RAS GTG AGT TTG CCA AGC AGT CA | 1503bp              |
| homo-vs.<br>heterozygous  | Forward CCA GCT CCC ATA GCT CAG TCT G                                | RAS ATG GGG AGA GTG AAG CAG AA | 1572bp IT           |
|                           |                                                                      | RAS GTG AGT TTG CCA AGC AGT CA | 2033bp WT           |
| additional<br>integration | Forward ATA ATA CCG CGC CAC ATA GC                                   | RAS ATG GGG AGA GTG AAG CAG AA | 1945bp              |
| P1+P2                     | Forward CCA GCT CCC ATA GCT CAG TCT G                                | RAS GAA AAG GGA ACC CAG CGA GT | 521bp               |
| P1+P4                     | Forward CCA GCT CCC ATA GCT CAG TCT G                                | RAS ATG GGG AGA GTG AAG CAG AA | 1569bp              |
| P3+P4                     | Forward CTT GTA GGC CTG CAT CAT CA                                   | RAS ATG GGG AGA GTG AAG CAG AA | 963bp               |
| P5+P7                     | Forward CAA CGT GCT GGT TAT TGT GC                                   | RAS CAC CTT GAA GCG CAT GAA CT | 1386bp              |
| P6+P9                     | Forward GAG GAG AAT CCC GGC CCT AGG ATG GTG AGC<br>AAG GGC GAG GAG G | RAS TTG AAT CTG TGA AGA CGG GC | 773bp               |
| P8+P12                    | Forward CAC CAT CGT GGA ACA GTA CG                                   | RAS TGA AGA GCA GAG CCA GGA AC | 1693bp              |
| P10+P11                   | Forward CATG AAG CCC CTT GAG CATC                                    | RAS CAG CTC AGG TTC TGG GAG AG | 824bp               |
| P1+P4+P13                 | Forward CCA GCT CCC ATA GCT CAG TCT G                                | RAS ATG GGG AGA GTG AAG CAG AA | 1569bp WT           |
|                           |                                                                      | RAS GTG AGT TTG CCA AGC AGT CA | 2033bp IT           |

**Table S2: Antibodies used for immunocytochemistry / flow cytometry**

|                          | <b>Antibody</b>                           | <b>Dilution</b> | <b>Company Cat# and RRID</b>                  |
|--------------------------|-------------------------------------------|-----------------|-----------------------------------------------|
| Pluripotency Markers     | Mouse anti-OCT3/4                         | 1:100           | Santa Cruz Cat# sc-5279                       |
|                          | Mouse anti-TRA-1-60                       | 1:100           | Abcam Cat# 16288                              |
|                          | Mouse anti-SSEA4                          | 1:100           | DSHB Cat# MC813-70 (ab16287)                  |
| Differentiation Markers  | Mouse anti- $\alpha$ -Fetoprotein         | 1:300           | R&D Cat# MAB1368                              |
|                          | Mouse anti- $\alpha$ -Actinin, Sarcomeric | 1:800           | Sigma Aldrich Cat# A7811                      |
|                          | Mouse anti- $\beta$ -3-Tubulin            | 1:400           | Millipore Cat #05-559                         |
| Detection of human cells | Mouse anti-human-Nucleoli                 | 1:400           | Abcam Cat# ab190710                           |
| Secondary antibodies     | Cy5 Donkey anti-mouse IgG                 | 1:200           | Jackson ImmunoResearch Labs Cat# 715-175-150, |
|                          | AF488 Donkey anti-goat IgG                | 1:200           | Jackson ImmunoResearch Labs Cat# 705-545-147  |

**Table S3: Overview of the Guide RNAs used for the Cas-mediated PCR-free enrichment of the construct sequence for Nanopore sequencing, including the respective sequences, PAMs (Protospacer Adjacent Motifs), strand information and position in the construct.**

| <b>Guide No.</b> | <b>Sequence</b>      | <b>PAM</b> | <b>Strand</b> | <b>Position in the construct</b> |
|------------------|----------------------|------------|---------------|----------------------------------|
| 2134             | AGTTGGGCGCGGGATCCGTA | AGG        | +             | 6578-6597                        |
| 2136             | ACAATCTTCTCGACCGACAC | AGG        | -             | 12439-12458                      |
| 55               | TTTGAGGACCTTCGACCAGC | TGG        | +             | 12632-12652                      |
| 2139             | AATCCTACCTAACGCACTCC | TGG        | -             | 18076-18095                      |

# Figure S1

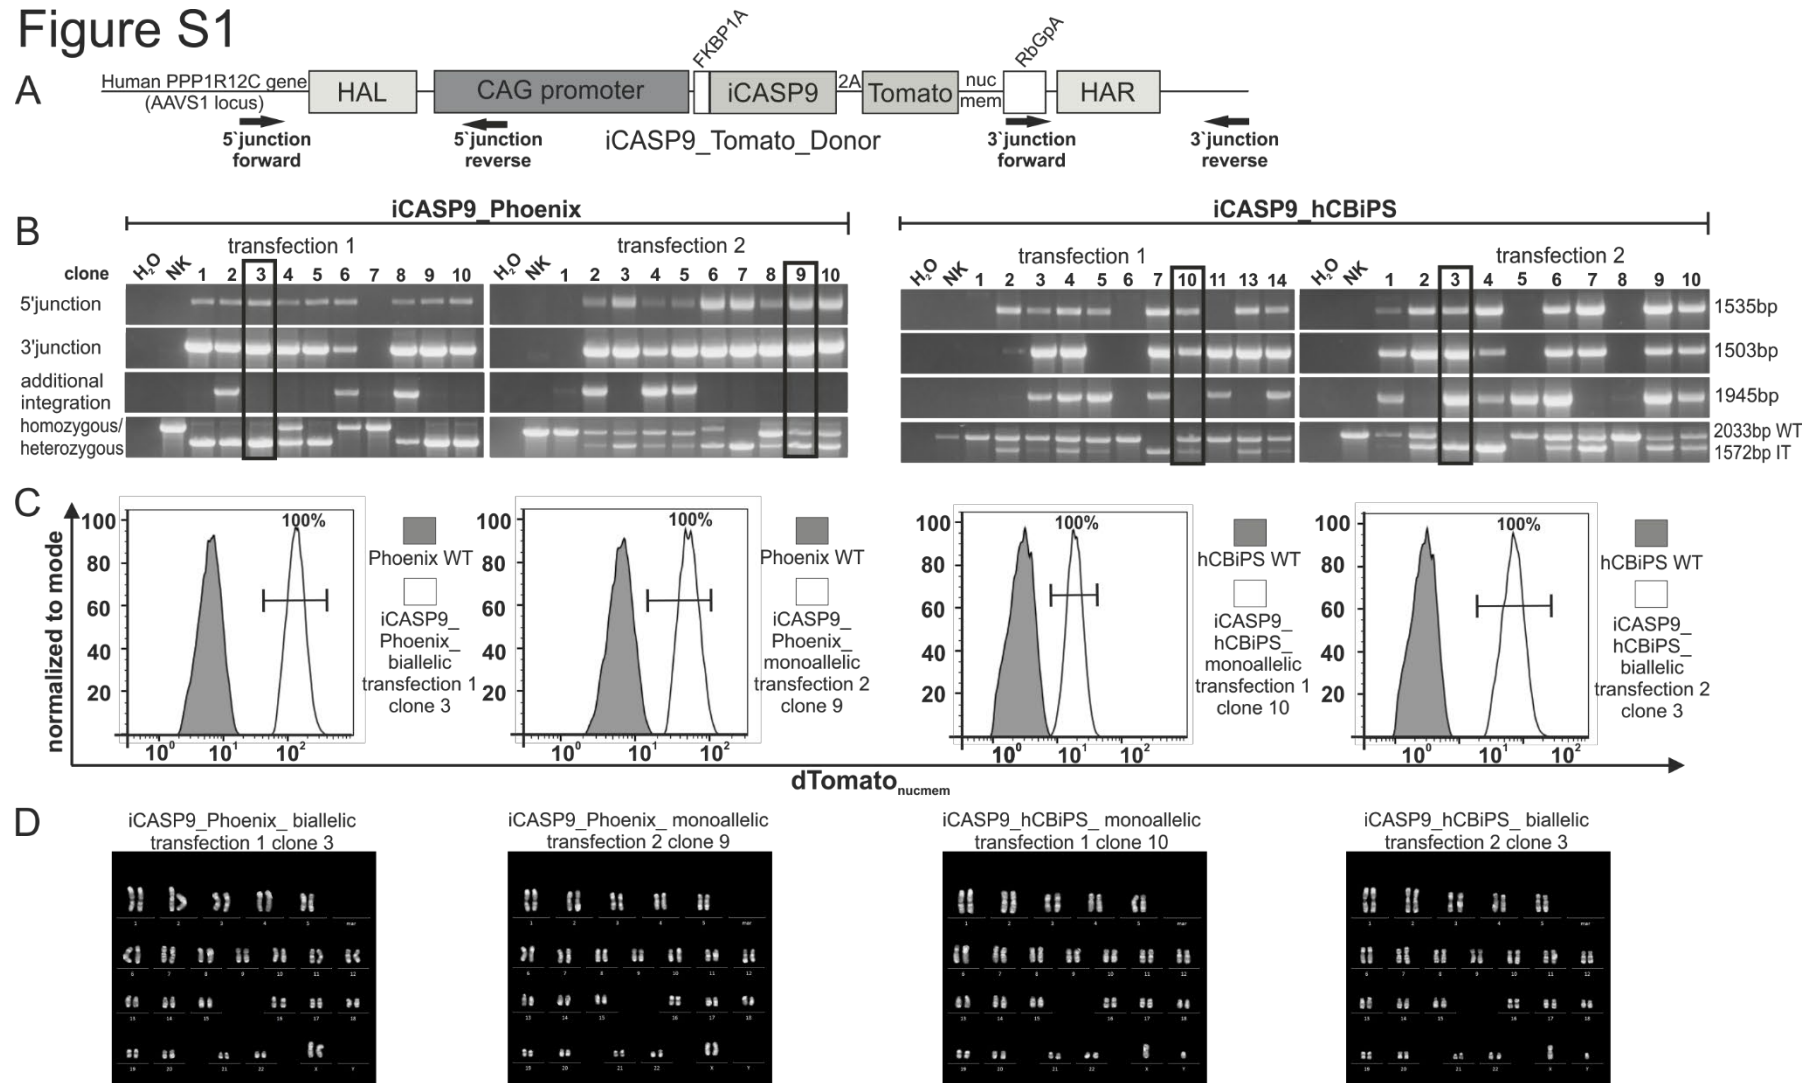

**Figure S1: Four iCASP9 iPSC clones were selected for further studies based on genotyping and flow cytometric analysis of dTomato<sub>nucmem</sub> expression and karyotype analysis.** A) Schematic illustration of primer combinations and locations used for genotyping of targeted iPSCs. B) Correctly targeted and dTomato<sub>nucmem</sub><sup>pos</sup> clones (marked with frames) were preselected based on demonstration of mono-/biallelic integration by junction PCRs on genomic DNA using primer pairs spanning the 5'- and the 3'- junction of the donor cassette and genomic AAVS1 sequence. Primers for additional integration are located in the backbone (AmpR, forward primer) and in the CAG promoter (reverse primer) of the donor backbone. Abbreviations: IT, integrated transgene; WT, wild type. C) Expression of dTomato<sub>nucmem</sub> was analyzed via flow cytometry. Representative histograms for dTomato<sub>nucmem</sub> expression of transgenic clones are shown. D) Karyotype analysis demonstrated absence of larger genomic aberrations. Representative metaphases are shown. Chromosome analysis was performed following standard cytogenetic procedures. At least 15-20 metaphases per clone were analyzed.

## Figure S2

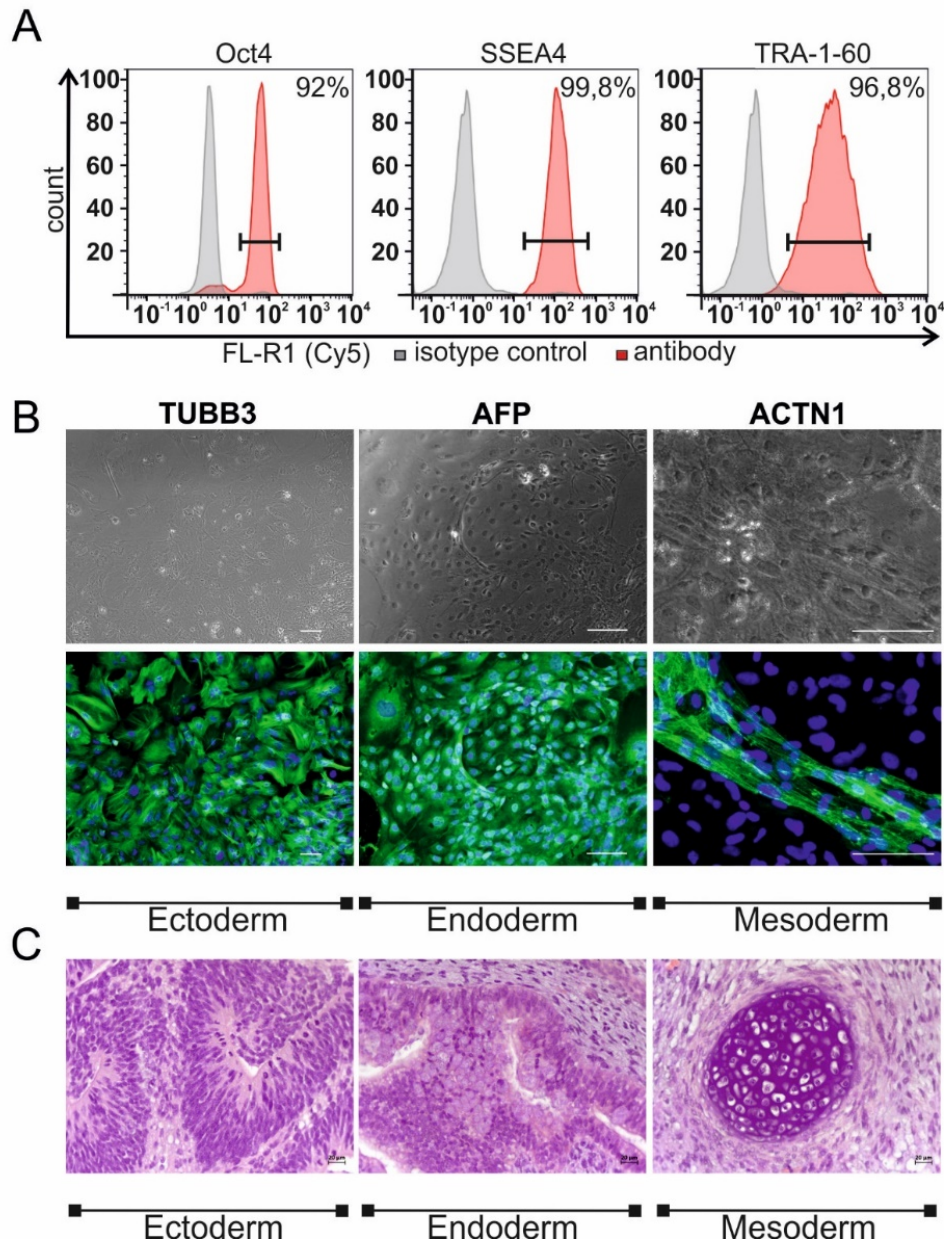

**Figure S2: Characterization of iCASP9 hiPSCs (exemplarily shown for monoallelic iCASP Phoenix).** A) Immunofluorescence staining of iCASP9 hiPSCs against OCT-3/4, SSEA4 and TRA-1-60 analyzed via flow cytometry demonstrate the expression of these typical pluripotency markers. B) Immunostaining of iCASP9 hiPSCs derivatives on d21 of differentiation revealed expression of ectodermal (TUBB3), endodermal (AFP), and mesodermal (ACTN1) marker proteins (green). Nuclei are stained with DAPI (blue). Scale bars: 100  $\mu$ m. C) Injection of undifferentiated monoallelic iCASP9 Phoenix iPSCs into immunodeficient NODSCID mice led to formation of teratomas containing derivatives of all three germ layers. Neural tube formation representing ectodermal differentiation. Endodermal epithelium with prominent mucus-producing cells representing endoderm and mesoderm formation. Chondrocytes showing mesoderm formation. (Scale bars represent 20 mm as depicted.)

Figure S3

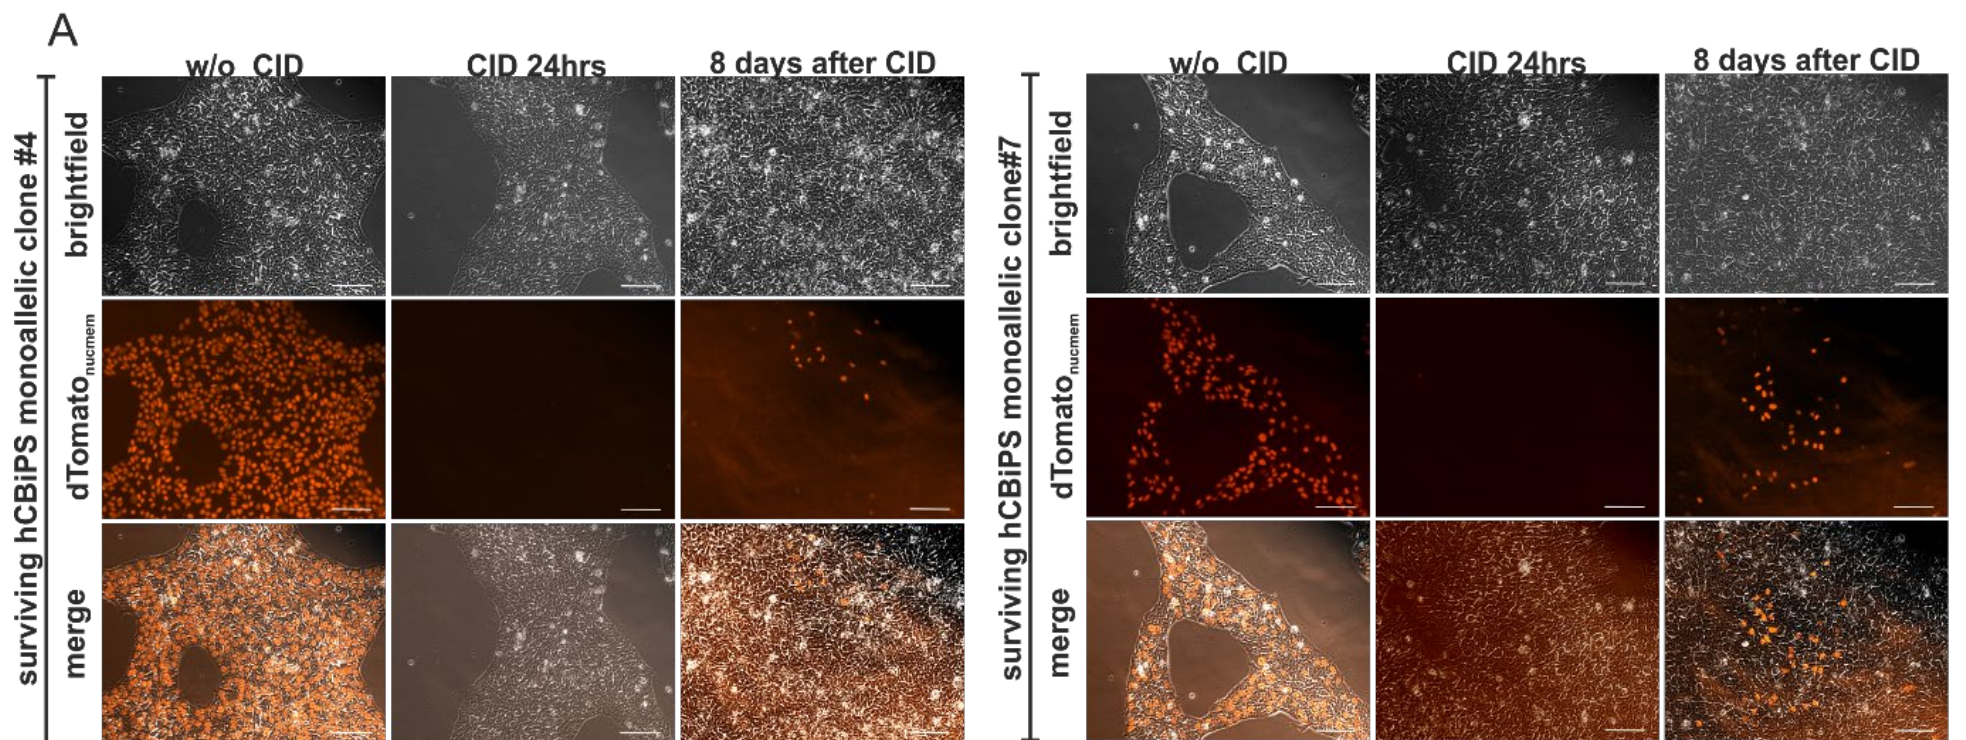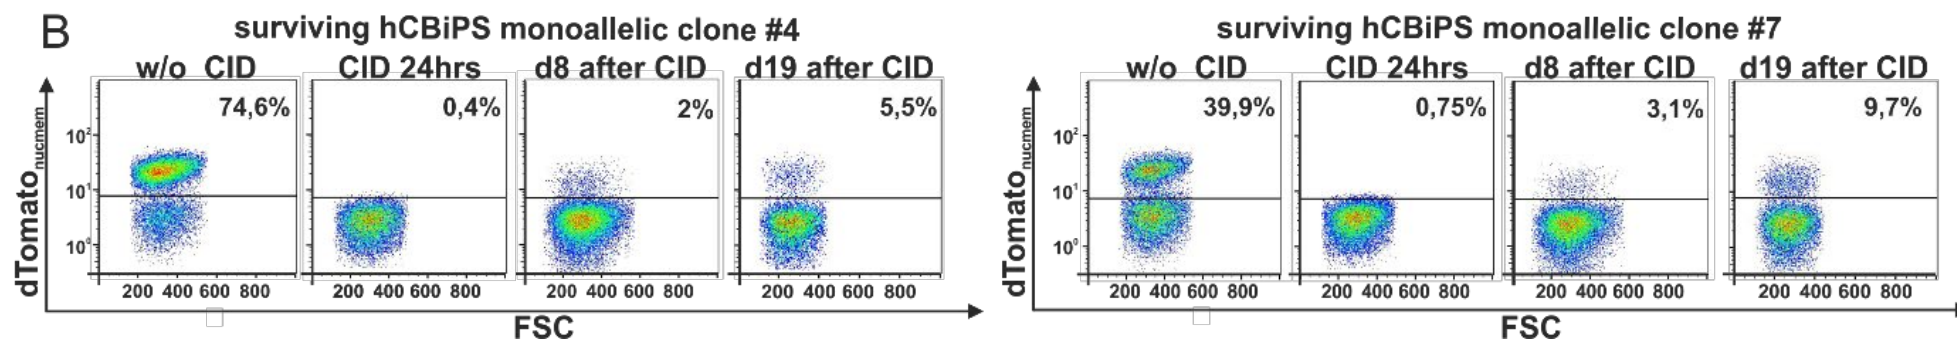



**Figure S3: dTomato<sub>nucmem</sub><sup>neg</sup> colonies that survived CID treatment partially regain dTomato<sub>nucmem</sub> expression after prolonged cultivation.**

Representative microscopic images and flow cytometric analysis of two monoallelic iCASP9 hCBiPS2 subclones treated with CID are shown. Left panel: monoallelic iCASP9 subclone #4, right panel: monoallelic iCASP9 subclone #7.

A) Left columns: show monoallelic hCBiPS2 single cell clones that survived initial treatment with CID during recovery under feeder-based culture conditions. These cultures contain dTomato<sub>nucmem</sub><sup>pos</sup> and dTomato<sub>nucmem</sub><sup>neg</sup> cells (Stage iii in Figure 5A). Middle columns show the hCBiPS2 clones after 2<sup>nd</sup> CID treatment for 24 h applied to eliminate the dTomato<sub>nucmem</sub><sup>pos</sup> fraction. Surviving cells are dTomato<sub>nucmem</sub><sup>neg</sup> (Stage iv in Figure 5A). Right column: Starting eight days after CID-treatment increasing proportion of apparently non-methylated cells with detectable dTomato<sub>nucmem</sub> transgene expression could be observed (scale bar 100  $\mu$ m).

B) Left columns: show monoallelic hCCBiPSC clones after a 2<sup>nd</sup> CID treatment for 24 hours to eliminate the dTomato<sub>nucmem</sub><sup>pos</sup> fraction. Surviving cells are dTomato<sub>nucmem</sub><sup>neg</sup> (Stage iv in Figure 5A). Middle right column: Starting eight days after CID-treatment new dTomato<sub>nucmem</sub><sup>pos</sup> cells could be observed (scale bar 100 $\mu$ m). Right column: 19 days after 2<sup>nd</sup> CID treatment the proportion of dTomato<sub>nucmem</sub><sup>pos</sup> cells had further increased suggesting continuous demethylation of the CAG promoter / PPP1R12C locus.

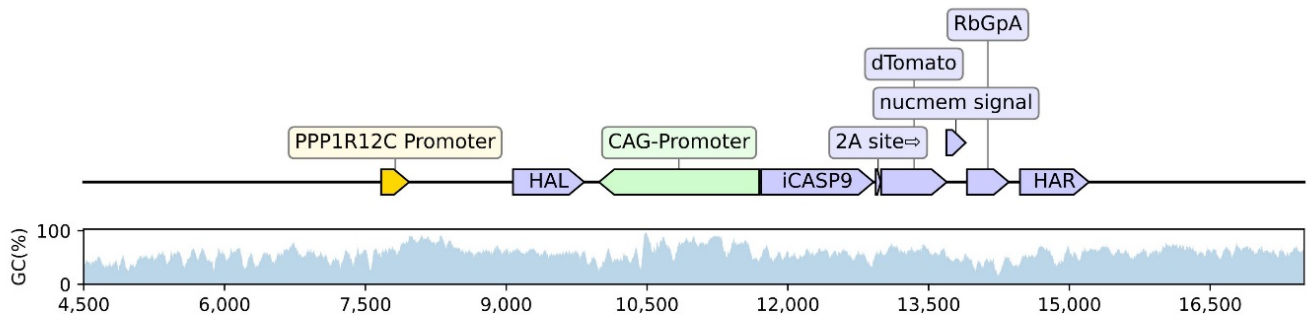

**Figure S4: Schematic illustration of CpG contents in the iCASP9 suicide construct integrated into the AAVS1 locus.** Content of CpGs is shown for the iCASP9 suicide construct and surrounding areas of the human PPP1R12C gene.

Figure S5

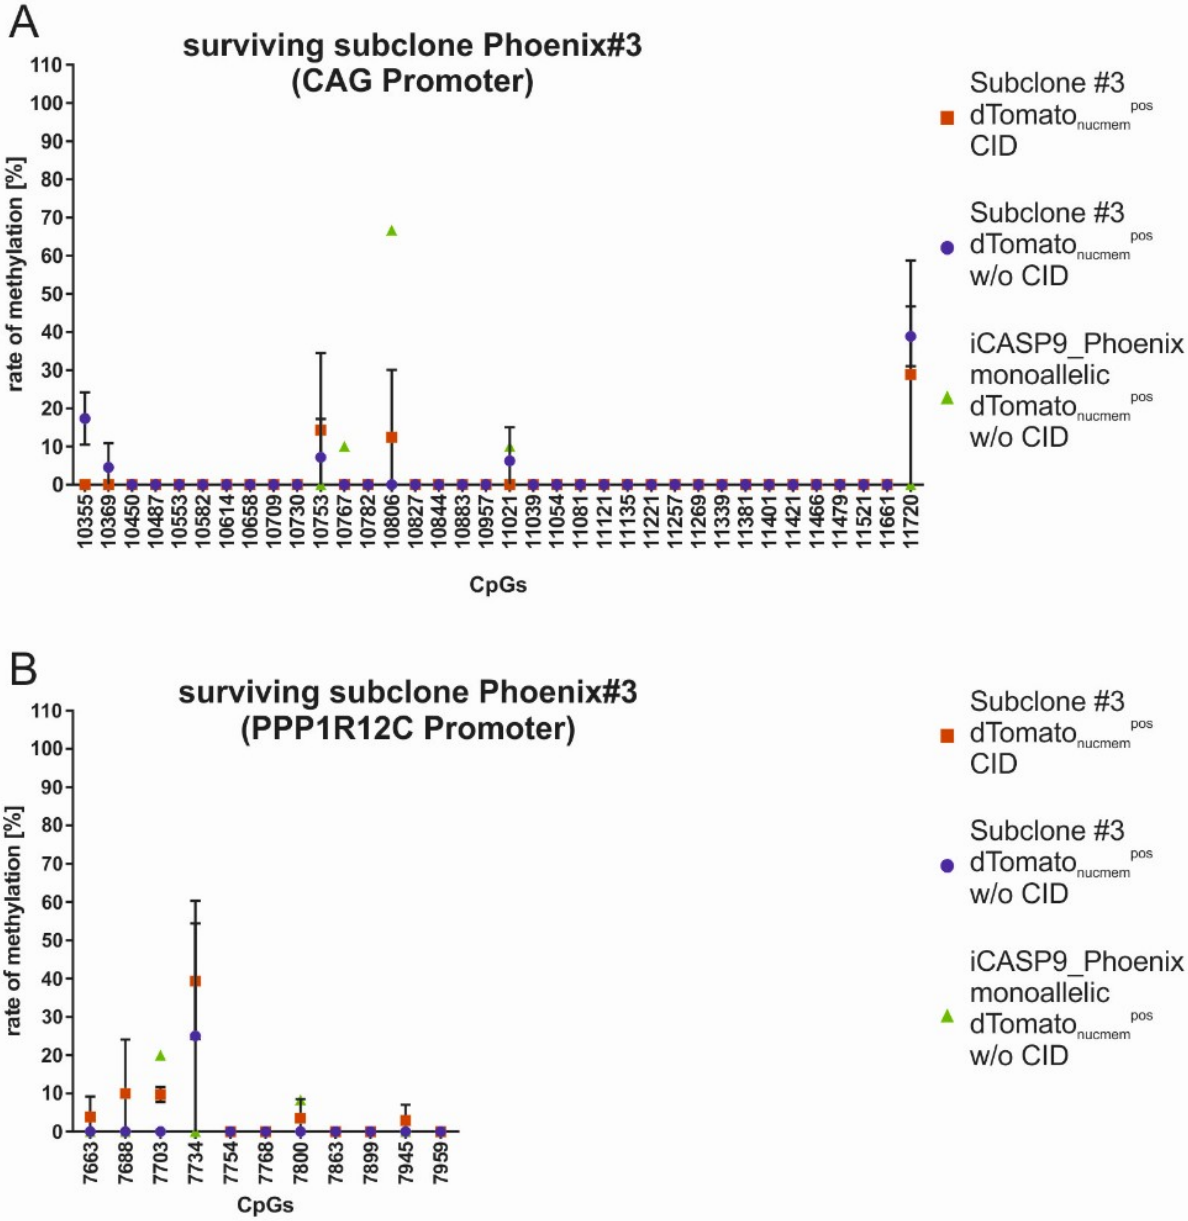

**Figure S5: Nanopore Sequencing showed no elevated methylation of the CAG promoter and the endogenous PPP1R12C promoter in the CID resistant monoallelic Phoenix subclone #3.** A) Analysis of CpGs in the CAG Promoter of surviving monoallelic subclone #3 did not provide evidence for increased methylation that could explain the survival of the CID treatment. B) In addition, the Nanopore Sequencing analysis of the PPP1R12C showed no changes in methylation status. Data are presented as mean  $\pm$  SD (n = 2). A scheme of CpG islands in the AAVS1 locus and the integrated iCASP9 donor construct is shown in Figure S4.

A Figure S6

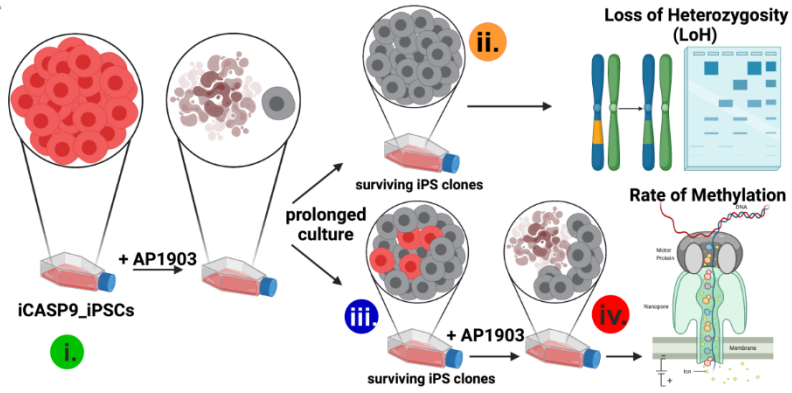

B

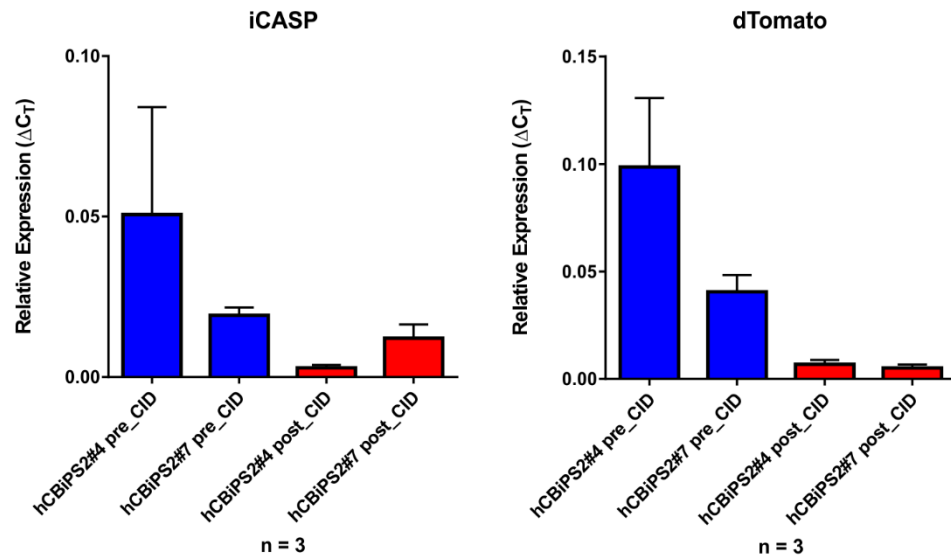

C

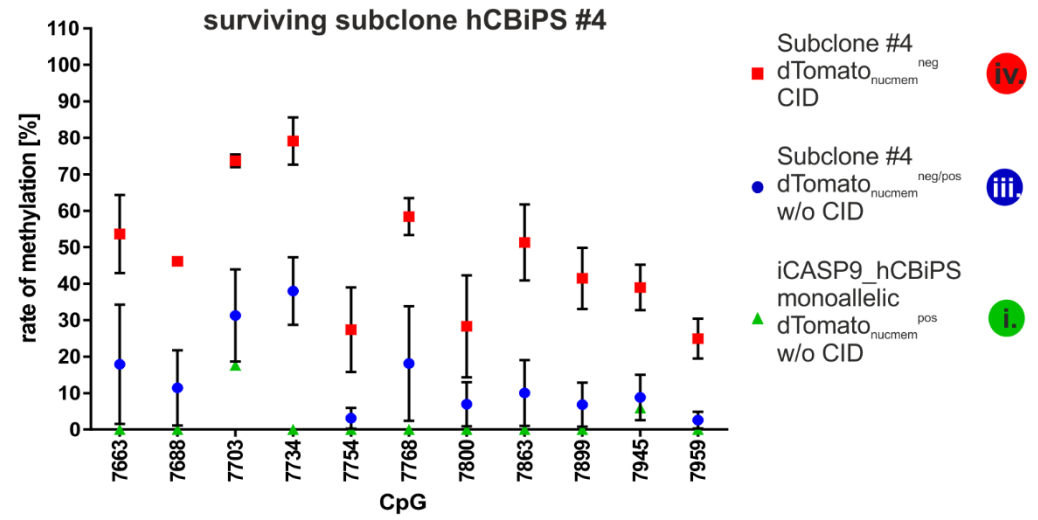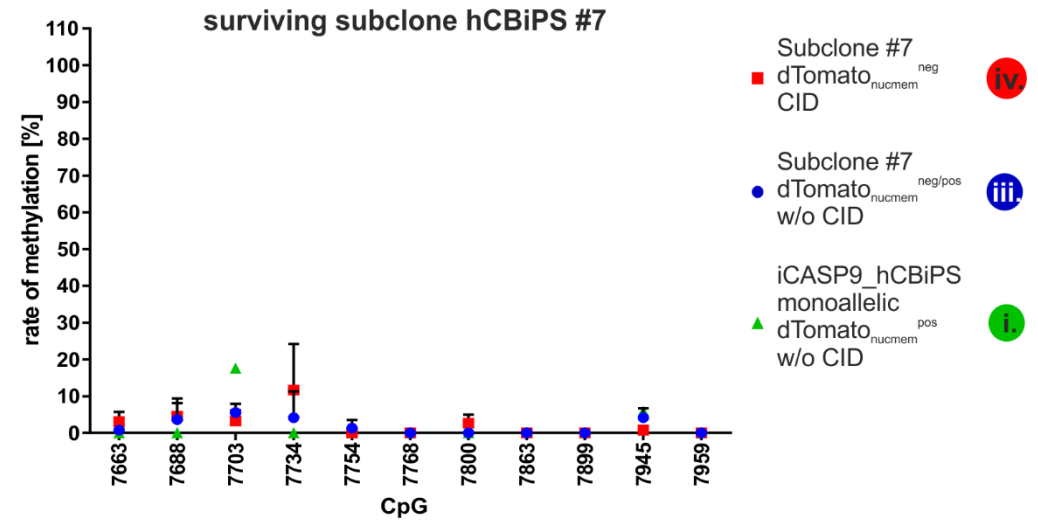

**Figure S6: Methylation of the endogenous PPP1R12C promoter may contribute to transgene silencing in CID resistant monoallelic iPSC subclones.** A) Scheme illustrating appearance and selection for Tomato<sub>nucmem</sub><sup>neg</sup> cells resistant to CID-induced apoptosis and re-appearance of Tomato<sub>nucmem</sub><sup>pos</sup> CID-sensitive cells during culture expansion, and analysis of different stages for LoH and methylation of promoter elements (and surrounding genomic DNA, data not shown). Colored circles mark stages that have been further analyzed for promoter methylation.

B) Methylation of the CAG and the PPP1R12C promoter led to strong downregulation of the iCASP9 and Tomato<sub>nucmem</sub><sup>neg</sup> transgenes in hCBiPS2 subclones #4 and #7.

C) Nanopore Sequencing showed elevated methylation of the PPP1R12C promoter in one out of two analyzed CID-resistant monoallelic dTomato<sub>nucmem</sub><sup>neg</sup> hCBiPS2 subclones that both show methylation of the CAG promoter but did not show transgene elimination.
